# Supplementary material
Source: PubMed Central journal article supplement (PMC2682469)
Supplement: jc.2008-1223_1.pdf [file jc.2008-1223_1.pdf]

Online supplement. Figure I. Macrophage SR-BI protein distribution in HALP subjects.

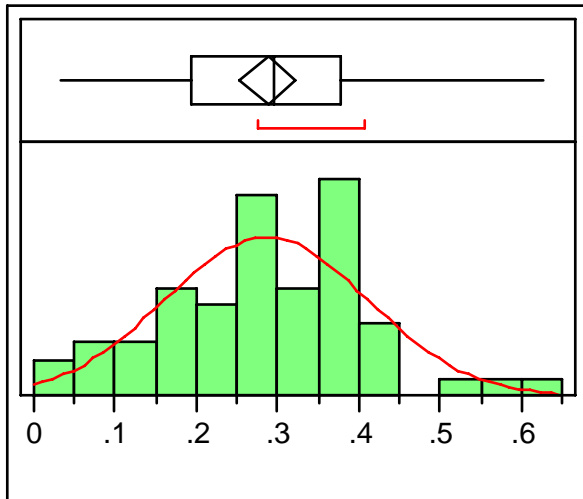

Normal(0.28765,0.12547)

**Quantiles**

|        |          |         |
|--------|----------|---------|
| 100.0% | maximum  | 0.62772 |
| 99.5%  |          | 0.62772 |
| 97.5%  |          | 0.59703 |
| 90.0%  |          | 0.41928 |
| 75.0%  | quartile | 0.37876 |
| 50.0%  | median   | 0.29400 |
| 25.0%  | quartile | 0.19323 |
| 10.0%  |          | 0.11386 |
| 2.5%   |          | 0.03791 |
| 0.5%   |          | 0.03200 |
| 0.0%   | minimum  | 0.03200 |

**Moments**

|                |           |
|----------------|-----------|
| Mean           | 0.2876476 |
| Std Dev        | 0.1254722 |
| Std Err Mean   | 0.0169187 |
| upper 95% Mean | 0.3215675 |
| lower 95% Mean | 0.2537277 |
| N              | 55        |

**Fitted Normal**

**Parameter Estimates**

| Type       | Parameter | Estimate  | Lower 95% | Upper 95% |
|------------|-----------|-----------|-----------|-----------|
| Location   | Mu        | 0.2876476 | 0.2537277 | 0.3215675 |
| Dispersion | Sigma     | 0.1254722 | 0.1056305 | 0.1545620 |

**Goodness-of-Fit Test**

Shapiro-Wilk W Test

| W        | Prob<W |
|----------|--------|
| 0.980979 | 0.5308 |
