# Supplementary material
Source: PubMed Central journal article supplement (PMC2682469)

Figure II. SR-BI protein levels are inversely correlated with HDL-C levels in all subjects with HALP.

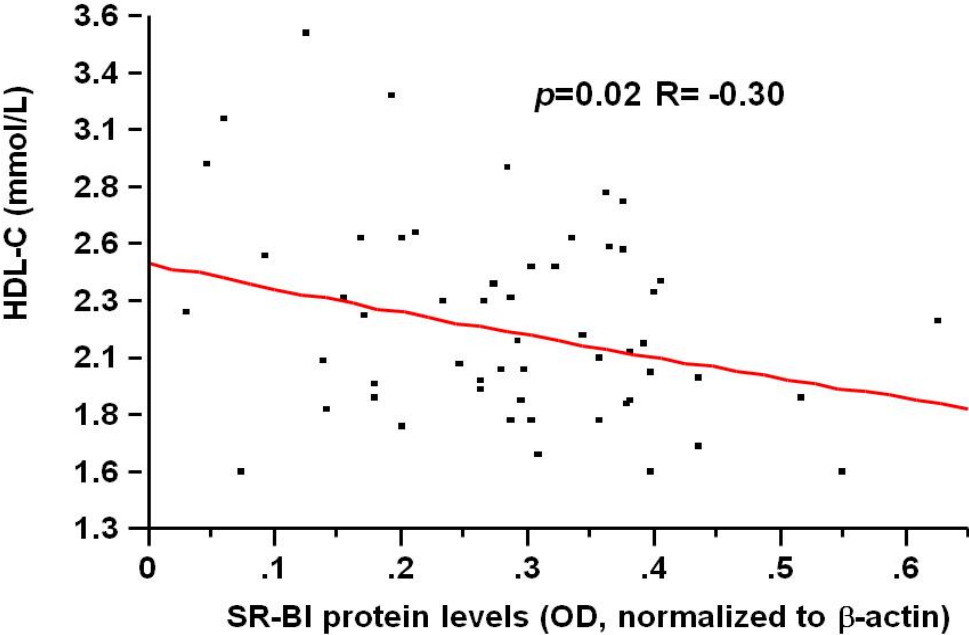

Supplement: jc.2008-1223_2.pdf [file jc.2008-1223_2.pdf]
