# Supplementary material
Source: PubMed Central journal article supplement (PMC2682469)

Figure III. SR-BI protein levels are inversely correlated with HDL size in all subjects with HALP.

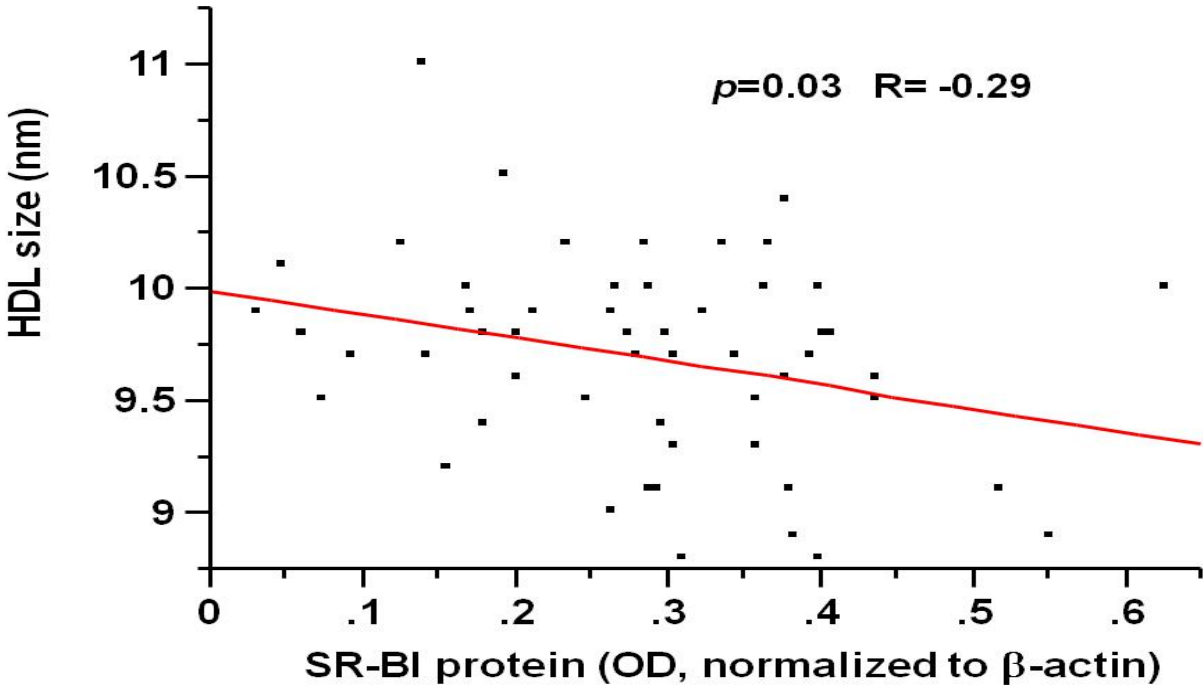

Supplement: jc.2008-1223_3.pdf [file jc.2008-1223_3.pdf]
