# Supplementary material
Source: PubMed Central journal article supplement (PMC2682469)

Figure V. Carriers of the minor alleles for rs4238001 and rs2278986 had significantly lower SR-BI protein levels.

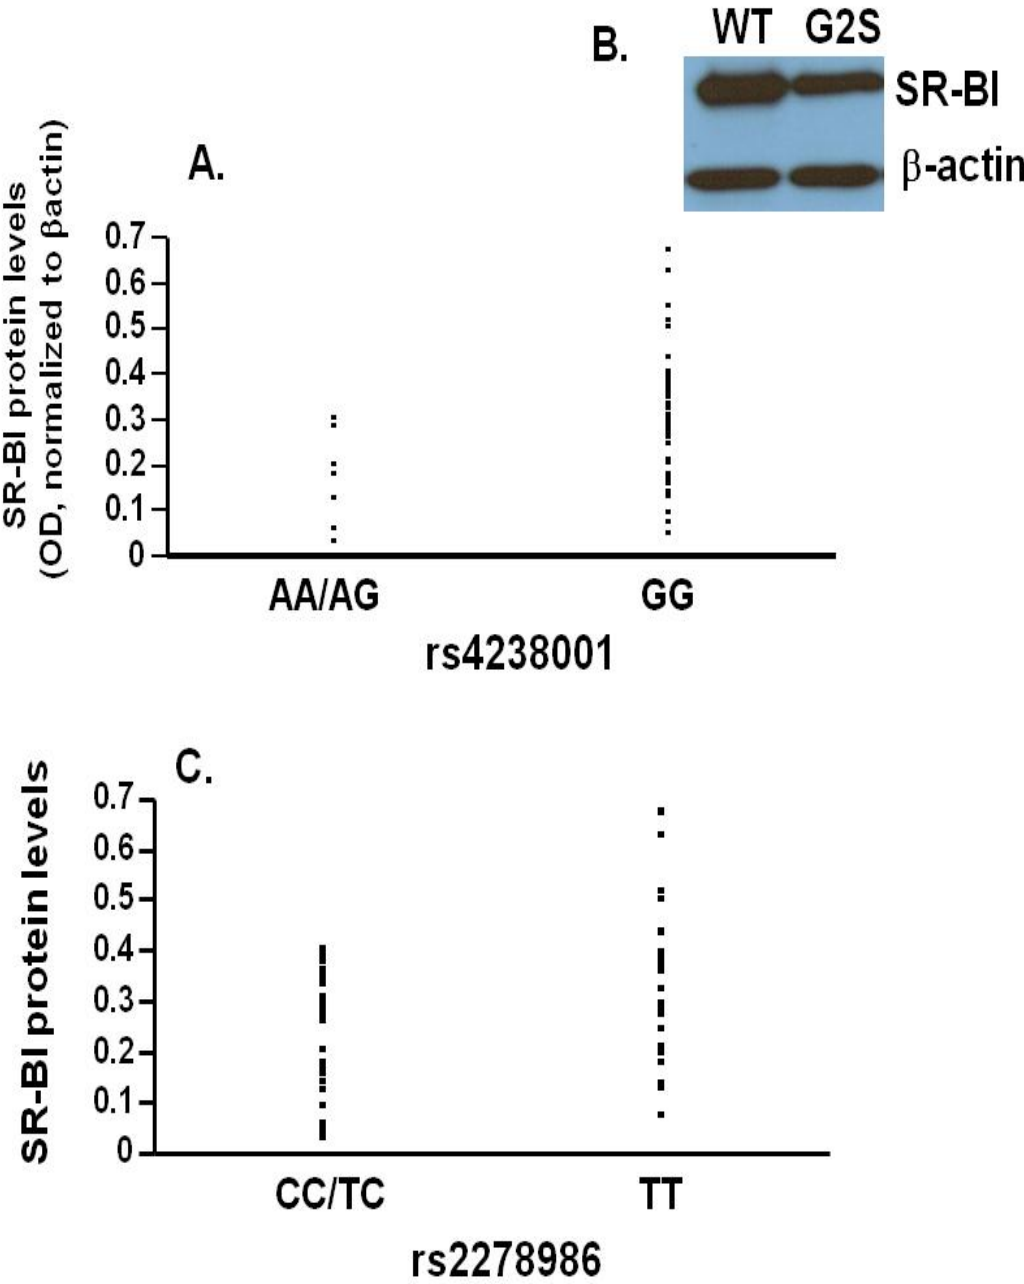

Supplement: jc.2008-1223_5.pdf [file jc.2008-1223_5.pdf]
