# Supplementary material
Source: PubMed Central journal article supplement (PMC2682469)
Supplement: jc.2008-1223_6.pdf [file jc.2008-1223_6.pdf]

**Table I. Multiple regression of independent predictors for HDL-C levels in the entire population of subjects with HALP.**

A. Initial full model ( $p < 0.0004$ ,  $r = 0.72$ )

Covariates: age ( $p = 0.89$ ), gender ( $p = 0.005$ ), BMI ( $p = 0.49$ ), exercise ( $p = 0.15$ ), alcohol use ( $p = 0.56$ ), HT use ( $p = 0.67$ ), TG ( $p = 0.02$ ), hemoglobin A1C ( $p = 0.06$ ), fish oil use ( $p = 0.007$ ), smoking ( $p = 0.28$ ), and SR-BI protein ( $p = 0.06$ ).

B. Final model ( $p < 0.0001$ ,  $r = 0.70$ )

|    |                 |             |
|----|-----------------|-------------|
| 1. | Gender          | $p = 0.001$ |
| 2. | A <sub>1c</sub> | $p = 0.04$  |
| 3. | TG              | $p = 0.007$ |
| 4. | Fish oil use    | $p = 0.008$ |
| 5. | SR-BI           | $p = 0.01$  |
