# Supplementary material
Source: PubMed Central journal article supplement (PMC2682469)
Supplement: jc.2008-1223_7.pdf [file jc.2008-1223_7.pdf]

**Table II. Multiple regression of independent predictors for SR-BI protein levels for the entire population of subjects with HALP.**

A. Initial full model ( $p=0.04$ ,  $r=0.65$ )

Covariates: gender ( $p=0.03$ ), BMI ( $p=0.01$ ), HT use ( $p=0.25$ ), ethnicity ( $p=0.12$ ), aspirin use ( $p=0.70$ ), CETP activity ( $p=0.46$ ), LCAT activity ( $p=0.68$ ), rs4238001 [G2S] ( $p=0.07$ ), rs2278986 [intron 3] ( $p=0.05$ ), and rs5888 [exon 8] ( $p=0.65$ ).

B. Final model ( $p=0.001$ ,  $r=0.59$ )

|    |           |           |
|----|-----------|-----------|
| 1. | BMI       | $p=0.008$ |
| 2. | rs4238001 | $p=0.02$  |
| 3. | rs2278986 | $p=0.02$  |
