# Supplementary material
Source: PubMed Central journal article supplement (PMC2682469)
Supplement: jc.2008-1223_8.pdf [file jc.2008-1223_8.pdf]

**Table III. Frequency of synonymous and nonsynonymous polymorphisms within *SCARB1* gene.**

| SNP name or genotype   | Location within <i>SCARB1</i> gene | Amino acid position change and Synonymous (S) or Nonsynonymous (NS) |    | Number of hyperalpha subjects who are either hetero- or homozygous for minor alleles |                                                          |                                                 |
|------------------------|------------------------------------|---------------------------------------------------------------------|----|--------------------------------------------------------------------------------------|----------------------------------------------------------|-------------------------------------------------|
|                        |                                    |                                                                     |    | 75 <sup>th</sup> percentile (high SR-BI protein)                                     | 50 <sup>th</sup> percentile (intermediate SR-BI protein) | 25 <sup>th</sup> percentile (low SR-BI protein) |
| Rs4238001<br>G→A       | Exon 1                             | Gly→Ser<br>(G2S)                                                    | NS | 0                                                                                    | 5                                                        | 3                                               |
| Rs2070242<br>C→T       | Exon 1                             | Ser→Ser<br>(S4)                                                     | S  | 1                                                                                    | 0                                                        | 0                                               |
| Rs10396208<br>C→T      | Exon 1                             | Cys→Cys<br>(C21)                                                    | S  | 0                                                                                    | 1                                                        | 1                                               |
| Rs5891<br>G→A          | Exon 3                             | Val→Iso<br>(V135I)                                                  | NS | 0                                                                                    | 0                                                        | 2                                               |
| Rs5889<br>C→T          | Exon 4                             | Gly→Gly<br>(G167)                                                   | S  | 1                                                                                    | 1                                                        | 0                                               |
| Rs5892<br>C→T          | Exon 7                             | Phe→Phe<br>(F301)                                                   | S  | 0                                                                                    | 2                                                        | 0                                               |
| Rs5888<br>C→T          | Exon 8                             | Ala→Ala<br>(A350)                                                   | S  | 4                                                                                    | 23                                                       | 8                                               |
| G→A                    | Exon 10                            | Gly→Arg                                                             | NS | 0                                                                                    | 0                                                        | 1                                               |
| Rs1069261<br>Insertion | Intron 1                           | Insertion TG                                                        | -  | 6                                                                                    | 22                                                       | 8                                               |
| Rs2278986<br>T→C       | Intron 3                           | -                                                                   | -  | 1                                                                                    | 20                                                       | 8                                               |
| Rs5801571<br>deletion  | Intron 9                           | Deletion C                                                          | -  | 4                                                                                    | 4                                                        | 2                                               |
| Rs838897<br>C→G        | Intron 10                          | -                                                                   | -  | 4                                                                                    | 8                                                        | 2                                               |
