# Supplementary material
Source: PubMed Central journal article supplement (PMC2682469)

Figure IV. SR-BI protein levels are positively correlated with CE uptake in all HALP subjects.

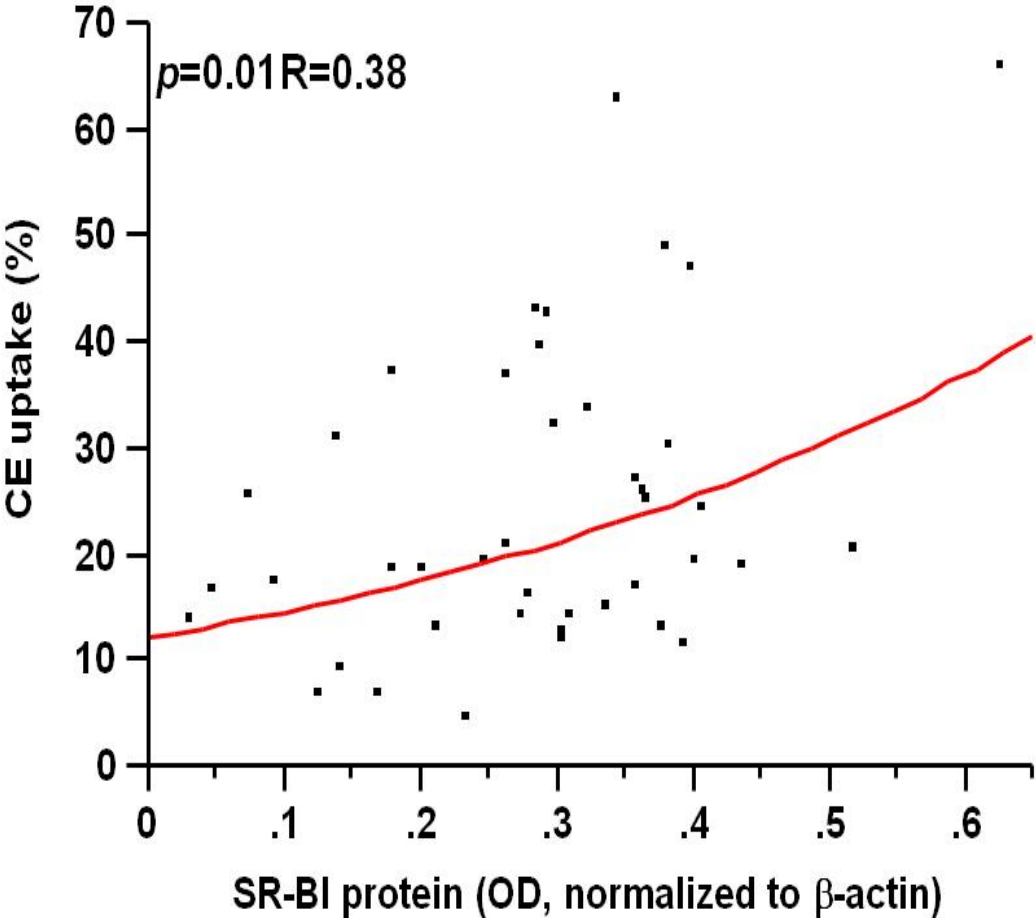

Supplement: jc.2008-1223_4.pdf [file jc.2008-1223_4.pdf]
